# Supplementary material for: Psychometric properties and use of the DEMQOL suite of instruments in research: a systematic review protocol
Source: PubMed Central journal article supplement — BMJ Open. 2021 Feb 5;11(2):e041318. doi: 10.1136/bmjopen-2020-041318 (PMC7925918; doi:10.1136/bmjopen-2020-041318), 2021-02-05
Supplement: bmjopen-2020-041318supp001.pdf [file bmjopen-2020-041318supp001.pdf]

## Appendix 1: Search Strategy

### 1. Ovid MEDLINE, EMBASE and PsycInfo

The following terms will be searched in the database default fields including title, abstract, MeSH/subject heading and author-supplied keyword fields:

*demqol\* OR dem-qol\* OR dementia quality of life scale*

### 2. Journals@Ovid

The following terms will be searched in the full-text of records:

*demqol\* OR dem-qol\* OR dementia quality of life scale*

### 3. EBSCO CINAHL/Academic Search Complete/Abs in Soc Gerontology

*TX(demqol\* OR "dem-qol\*" OR "dementia quality of life scale")*

(TX searches all database fields and full-text when full-text is available within the database)

### 4. ProQuest Dissertations & Theses Global

Following terms will be searched in the full-text of records:

*(demqol\* OR dem-qol\* OR "dementia quality of life scale")*

*AND*

*(dementia OR alzheimer\*)*

### 5. HAPI (Health & Psychosocial Instruments)

Following terms will be searched in the database default fields. Results will be browsed and any items not retrieved from other databases will be selected.

*demqol\* OR dem-qol\* OR dementia quality of life scale*

### 6. Wiley Online Library

The following terms will be searched in the full-text of records. Results will be browsed and any items not retrieved from database searching will be selected:

*demqol\* OR dem-qol\* OR "dementia quality of life scale"*

### 7. ScienceDirect

The following terms will be searched in the full-text of records:

*demqol OR dem-qol OR "dementia quality of life scale"*

### 8. Google Scholar

The following terms will be searched in the full-text of records. The first 10 pages of results and any items not retrieved from database searching will be selected

*demqol OR dem-qol OR "dementia quality of life scale"*
